# Supplementary material for: Ionic-liquid-based MS probes for the chemo-enzymatic synthesis of oligosaccharides
Source: Royal Society of Chemistry journal article supplement (doi:10.1039/c2ob25855b), 2012-01-01

## Electronic Supporting Information

### Ionic-liquid-based MS probes for the chemo-enzymatic synthesis of oligosaccharides

M. Carmen Galan,<sup>\*a</sup> Anh Tuan Tran<sup>a</sup>, Karen Bromfield<sup>a</sup>, Said Rabbani<sup>b</sup> and Beat Ernst<sup>b</sup>

#### Calibration and data acquisition

A standard curve was constructed for analog **2** at eight different concentrations around those found under the initial reaction conditions needed for initial-rate-method measurements.

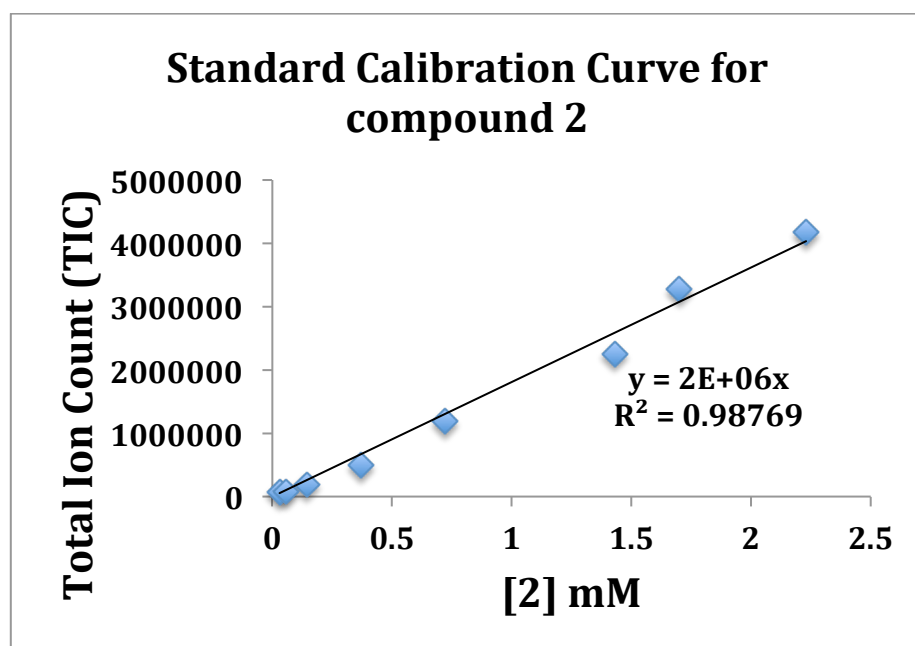

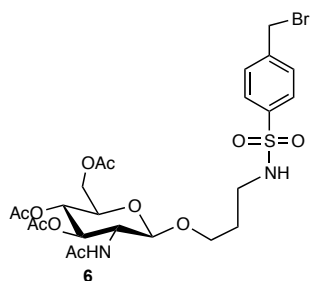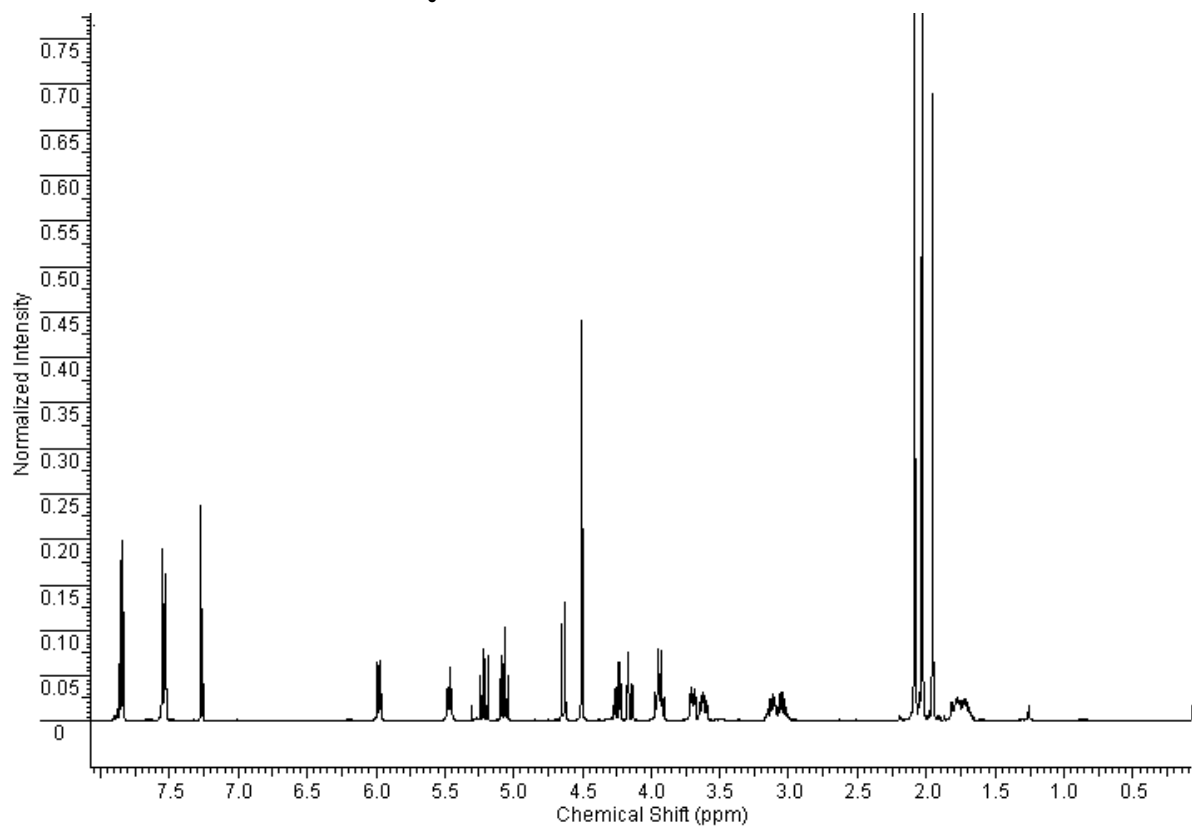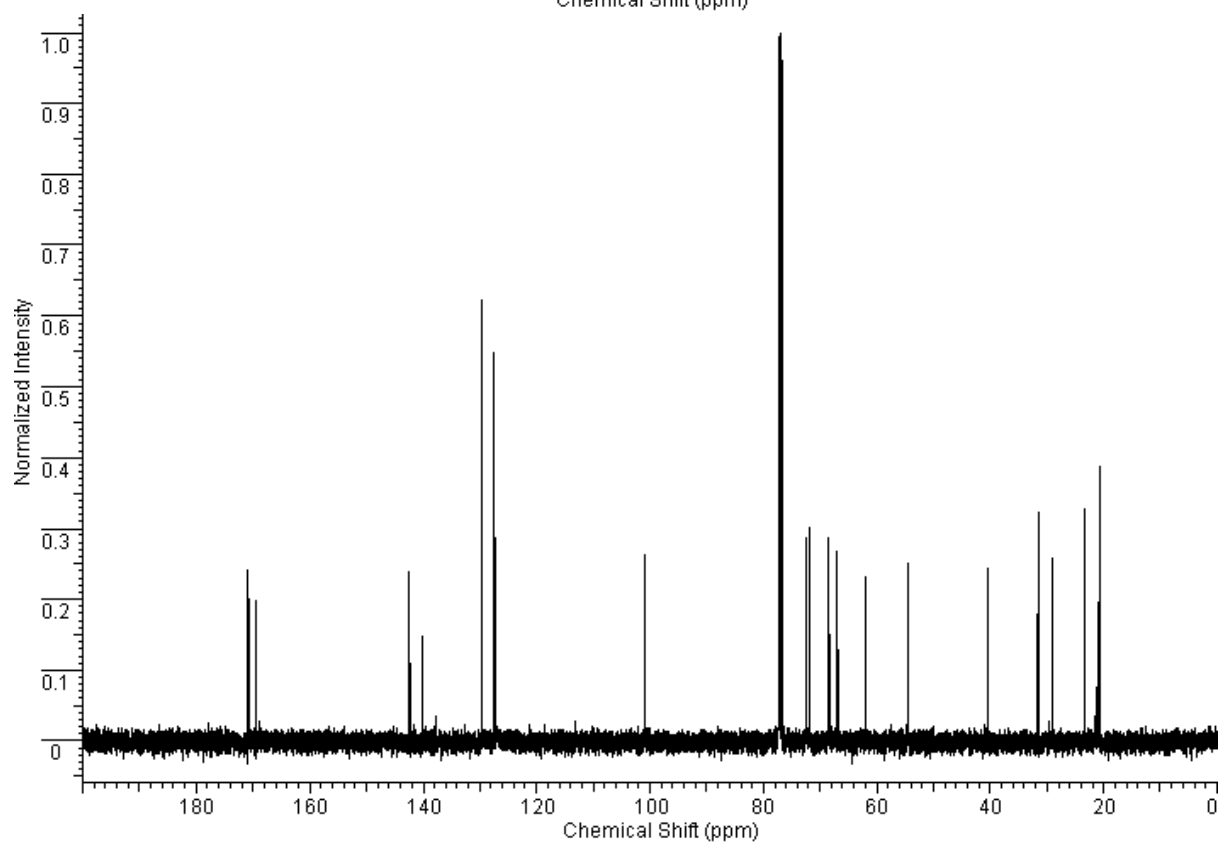

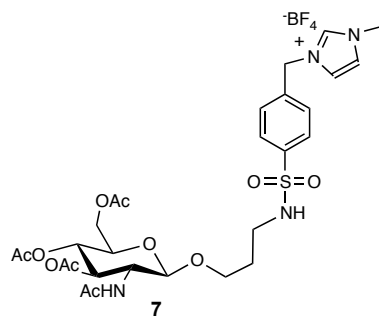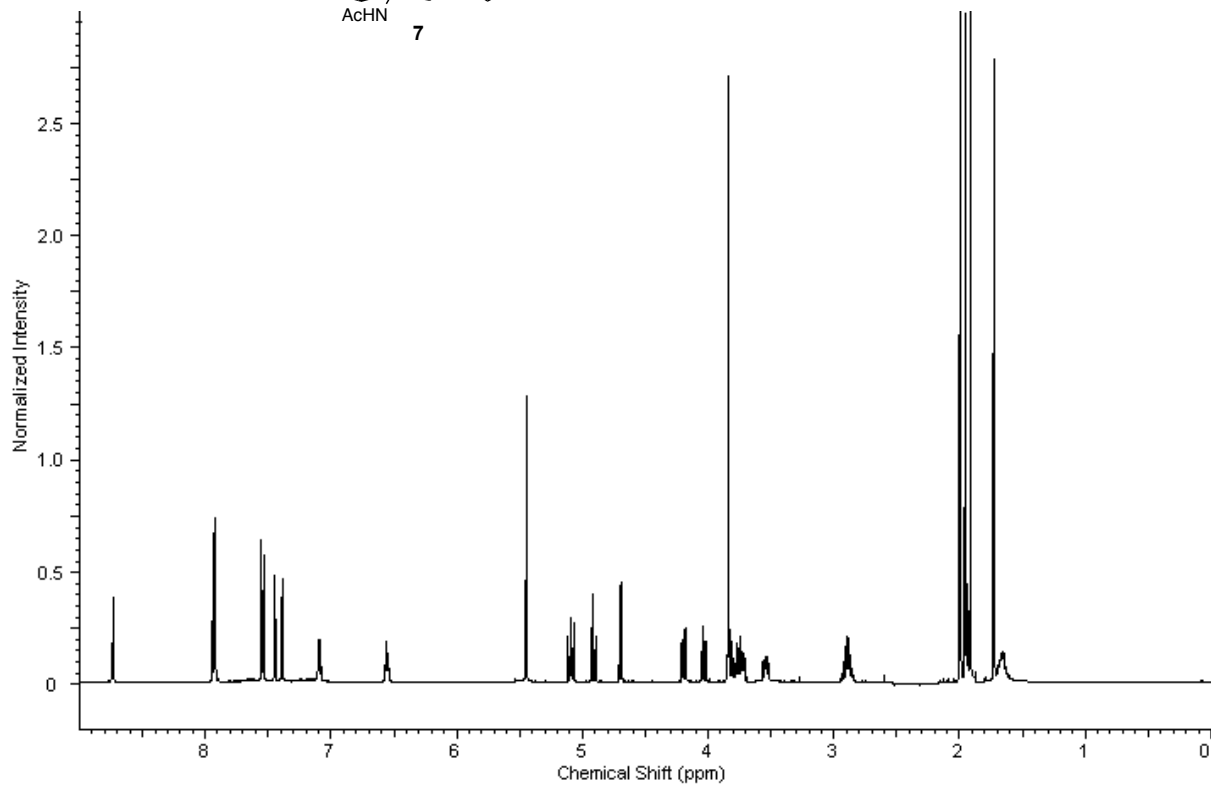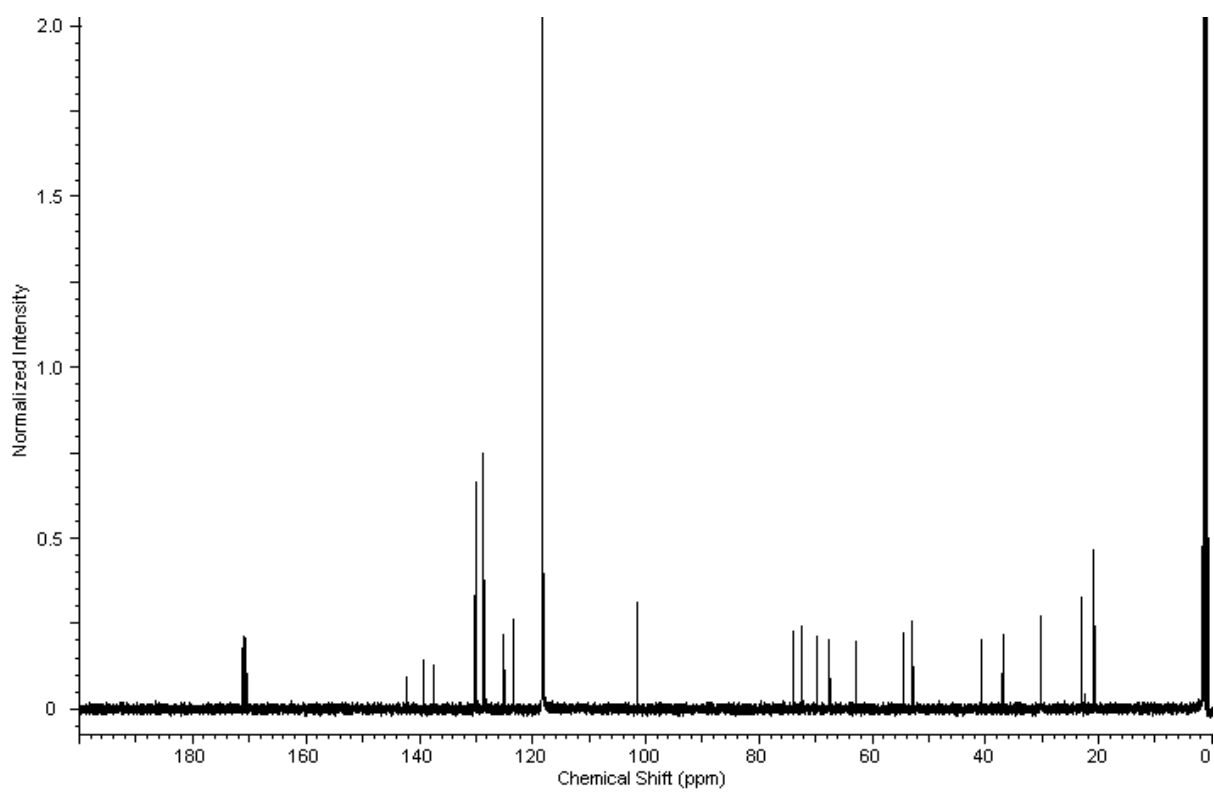

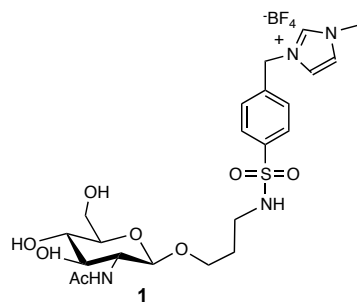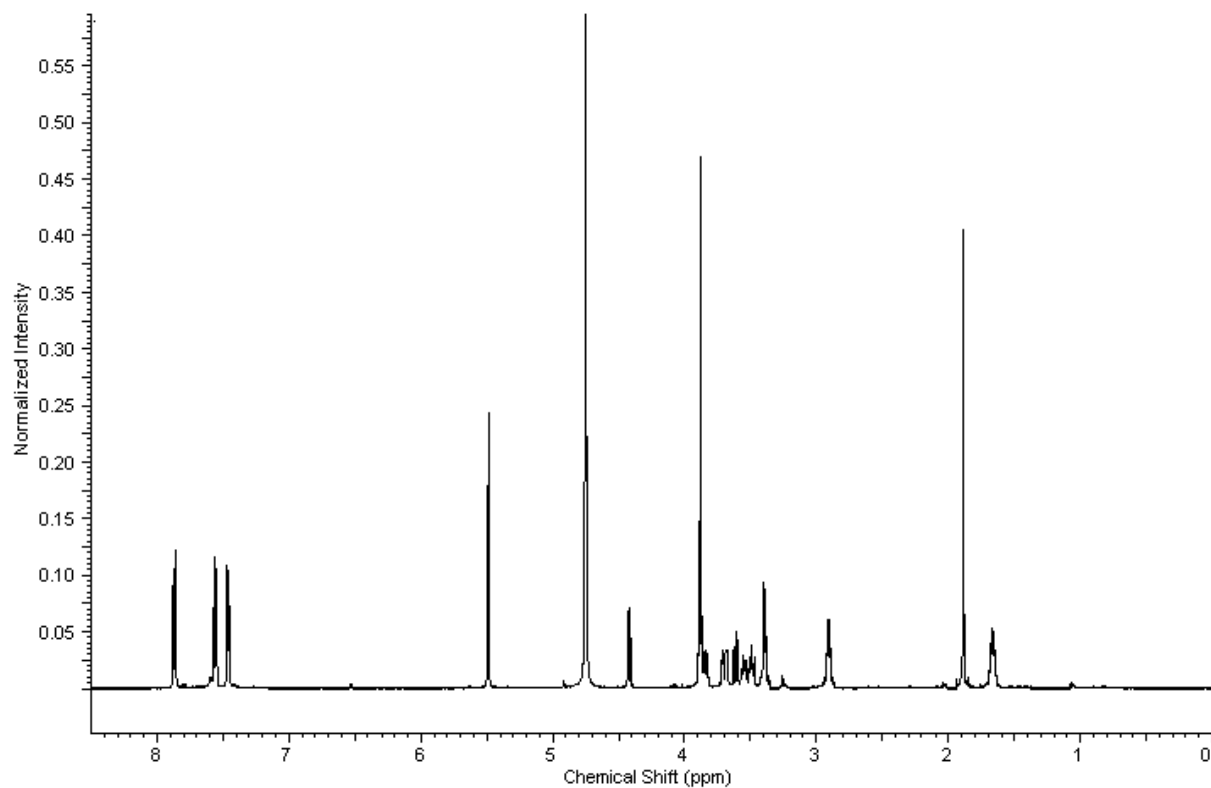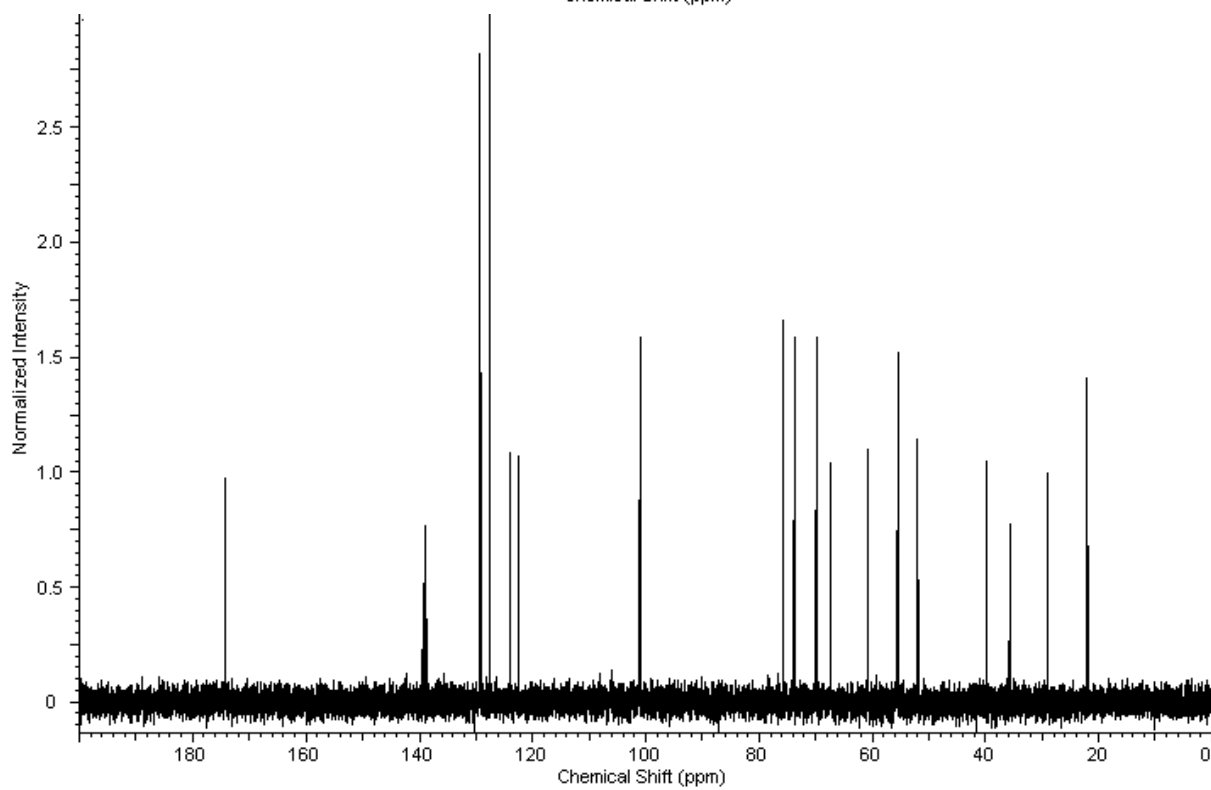

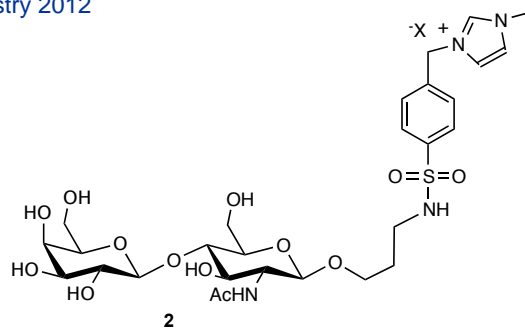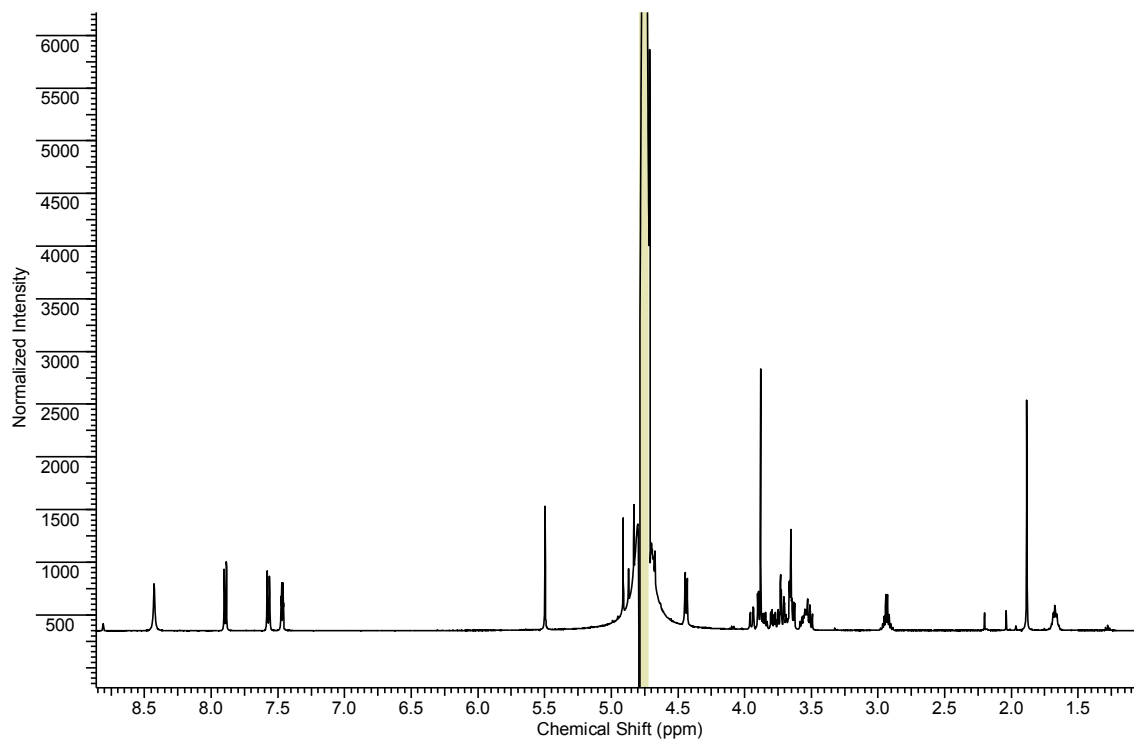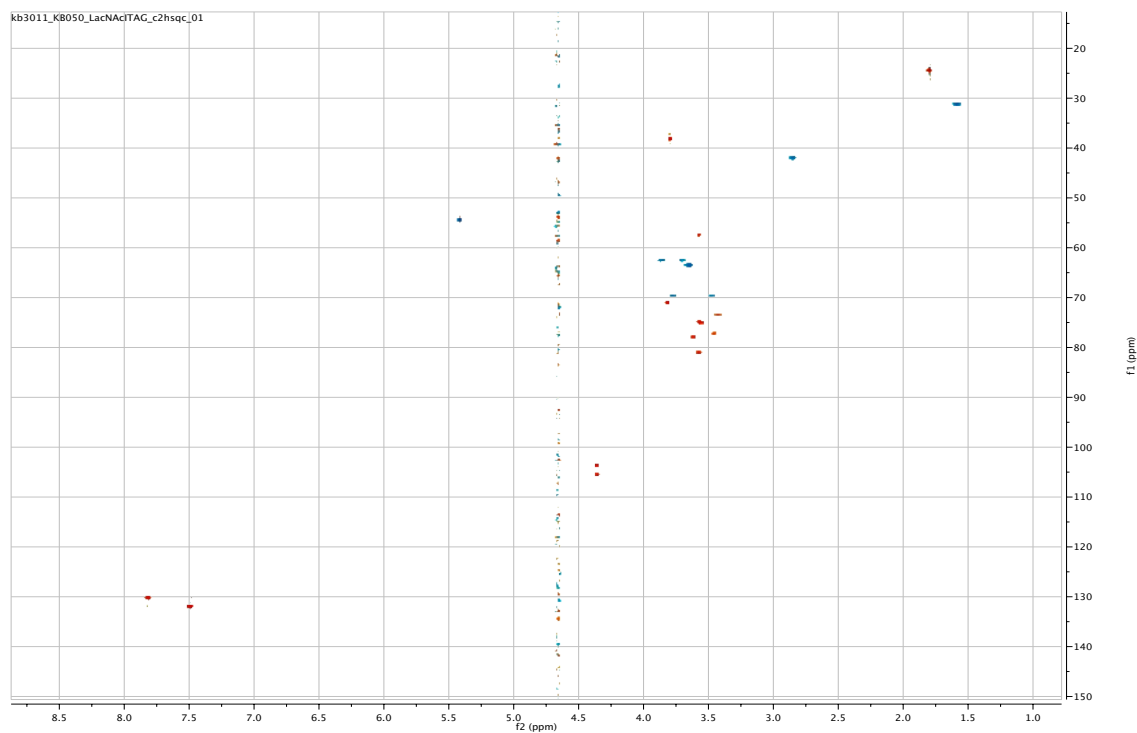

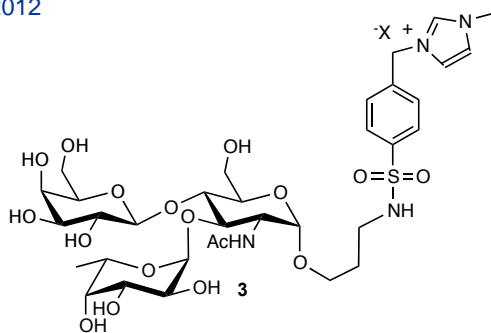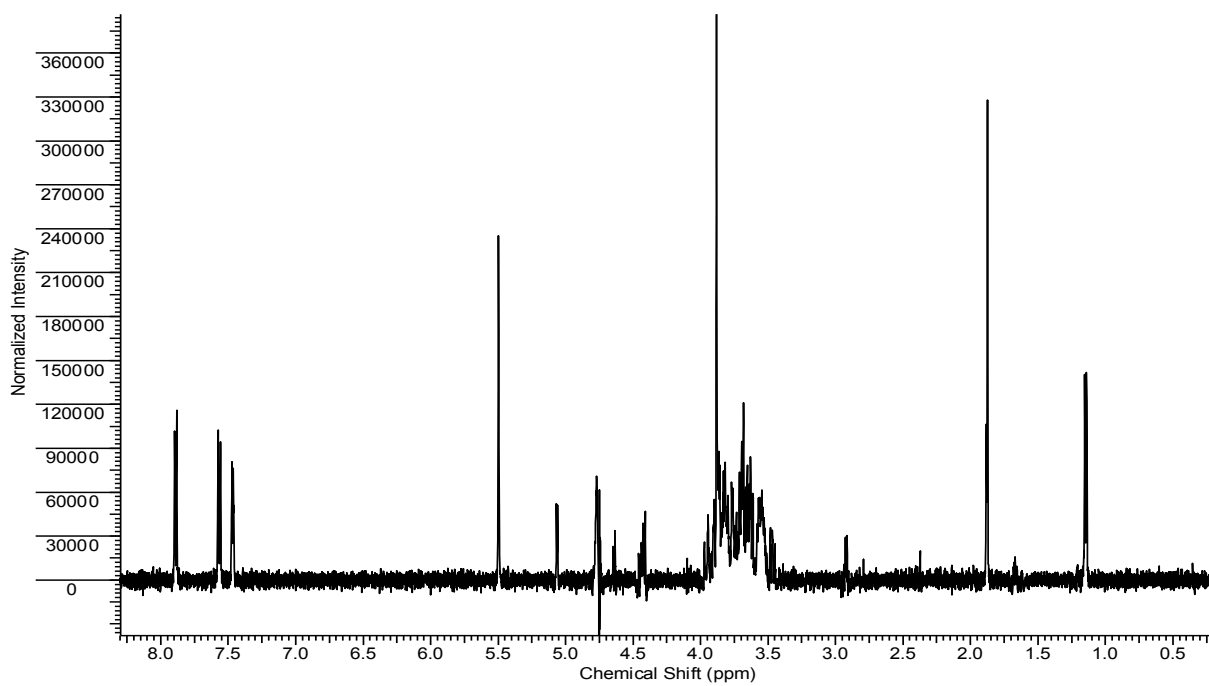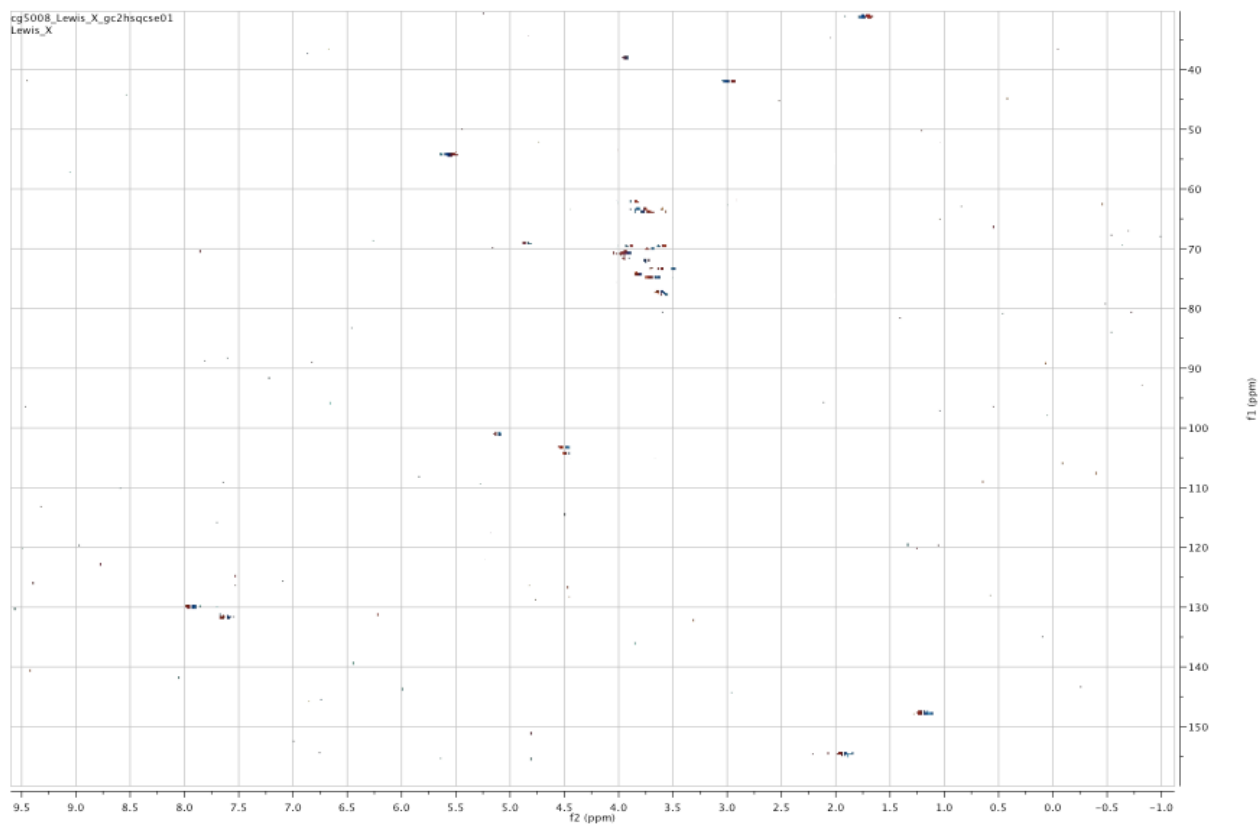

Supplement: c2ob25855b.pdf [file c2ob25855b.pdf]
